# Supplementary material for: Profiling grapevine trunk pathogens in planta: a case for community-targeted DNA metabarcoding
Source: PubMed Central journal article supplement (PMC6295080; doi:10.1186/s12866-018-1343-0), 2018-12-14

# GTAA

Compared to expected

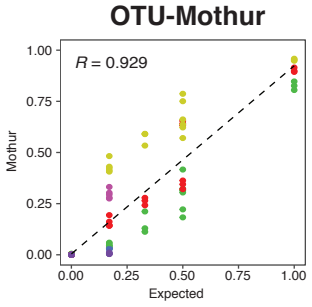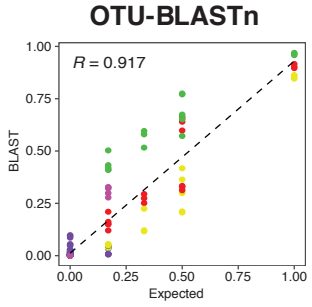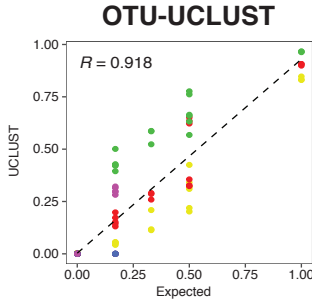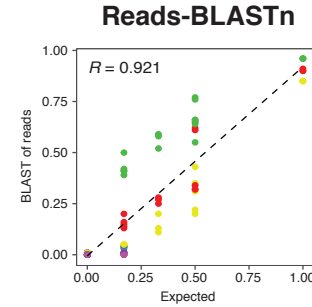

- Genus**
- Diaporthe*
  - Diplodia*
  - Eutypa*
  - Neofusicoccum*
  - Phaeoacremonium*
  - Phaeomoniella*

Compared to Mothur

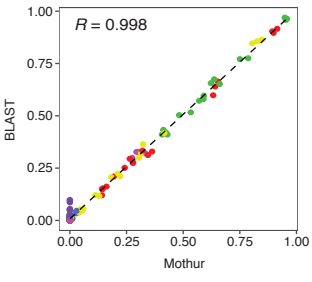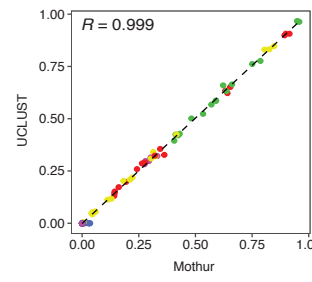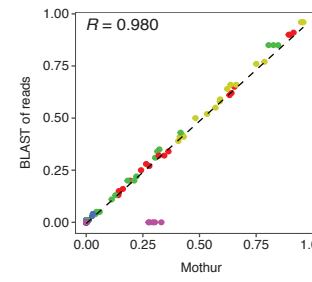

# BITS

Compared to expected

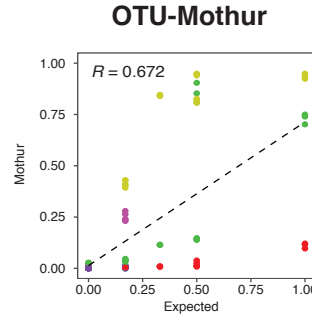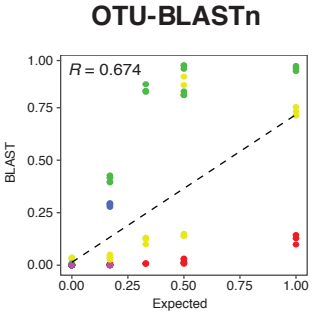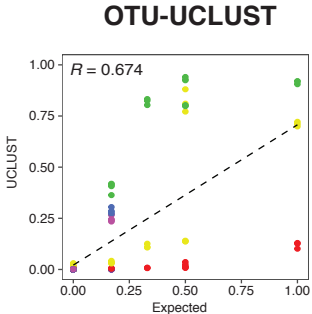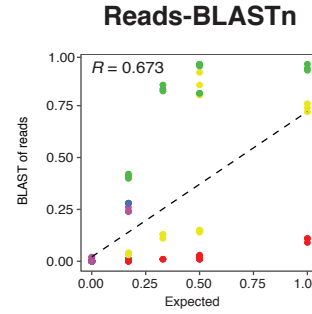

- Genus**
- Diaporthe*
  - Diplodia*
  - Eutypa*
  - Neofusicoccum*
  - Phaeoacremonium*
  - Phaeomoniella*

Compared to Mothur

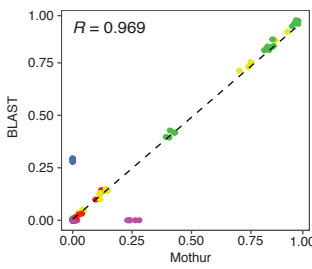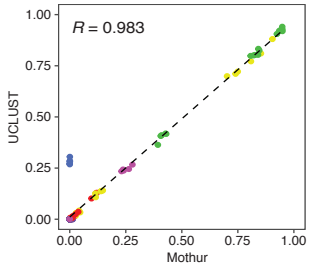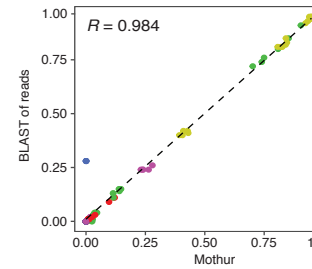

Supplement: 12866_2018_1343_MOESM4_ESM.pdf [file 12866_2018_1343_MOESM4_ESM.pdf]
