# Supplementary material for: Profiling grapevine trunk pathogens in planta: a case for community-targeted DNA metabarcoding
Source: PubMed Central journal article supplement (PMC6295080; doi:10.1186/s12866-018-1343-0), 2018-12-14

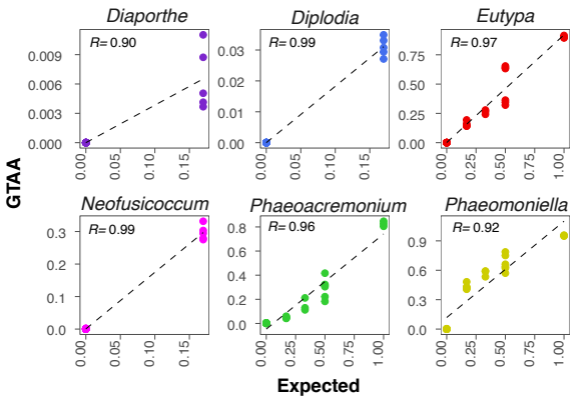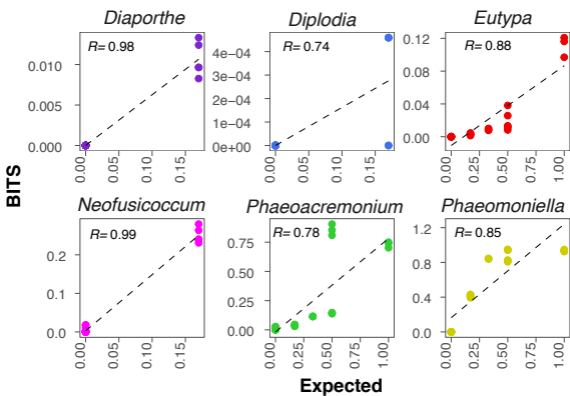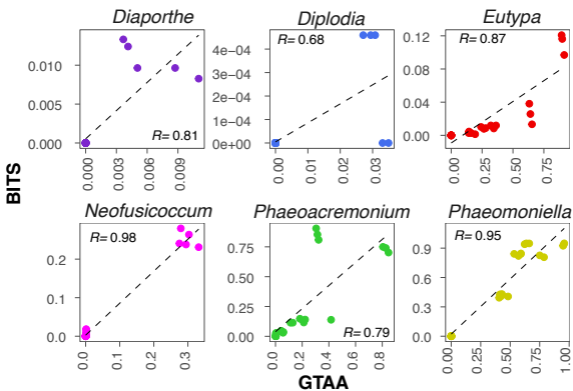

Supplement: 12866_2018_1343_MOESM5_ESM.pdf [file 12866_2018_1343_MOESM5_ESM.pdf]
