# Supplementary material for: Profiling grapevine trunk pathogens in planta: a case for community-targeted DNA metabarcoding
Source: PubMed Central journal article supplement (PMC6295080; doi:10.1186/s12866-018-1343-0), 2018-12-14

# GTAA

## OTU-Mothur

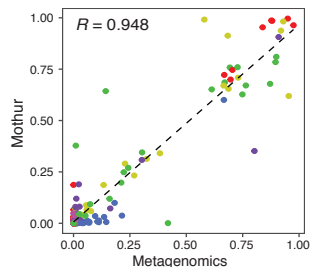

## OTU-BLASTn

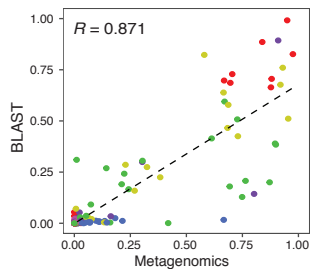

## OTU-UCLUST

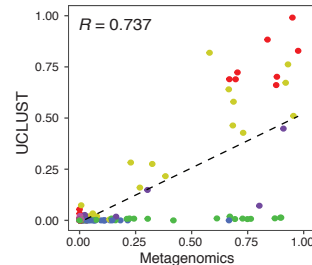

### Genus

- *Diaporthe*
- *Diplodia*
- *Eutypa*
- *Neofusicoccum*
- *Phaeoacremonium*
- *Phaeomoniella*

Compared to Mothur

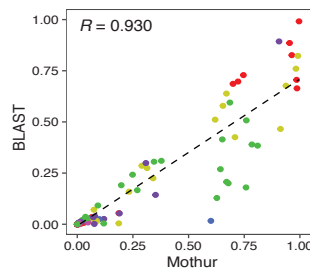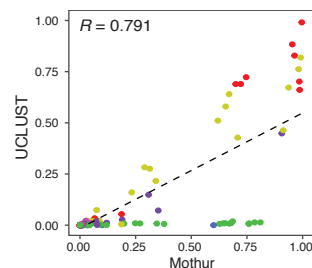

# BITS

## OTU-Mothur

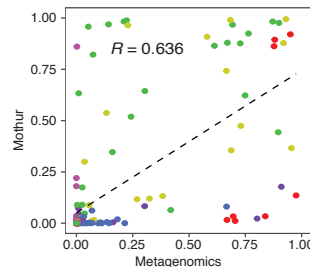

## OTU-BLASTn

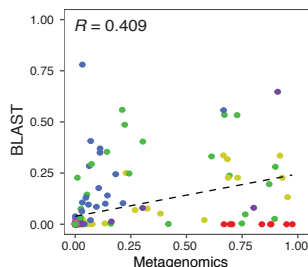

## OTU-UCLUST

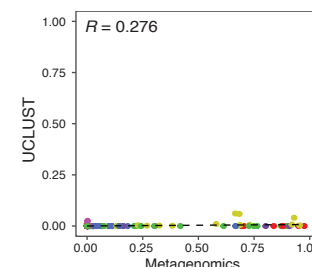

### Genus

- *Diaporthe*
- *Diplodia*
- *Eutypa*
- *Neofusicoccum*
- *Phaeoacremonium*
- *Phaeomoniella*

Compared to Mothur

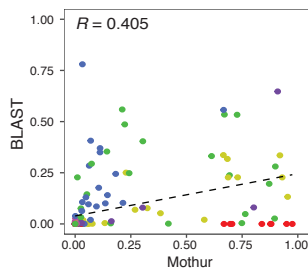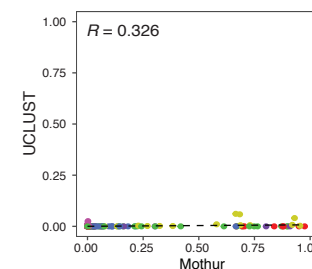

Supplement: 12866_2018_1343_MOESM6_ESM.pdf [file 12866_2018_1343_MOESM6_ESM.pdf]
